# Supplementary material for: Specific Rhizobacteria Responsible in the Rhizosheath System of Kengyilia hirsuta
Source: Frontiers journal article supplement (doi:10.3389/fpls.2021.785971), 2022-01-28
Supplement: Image_1.pdf [file Image_1.pdf]

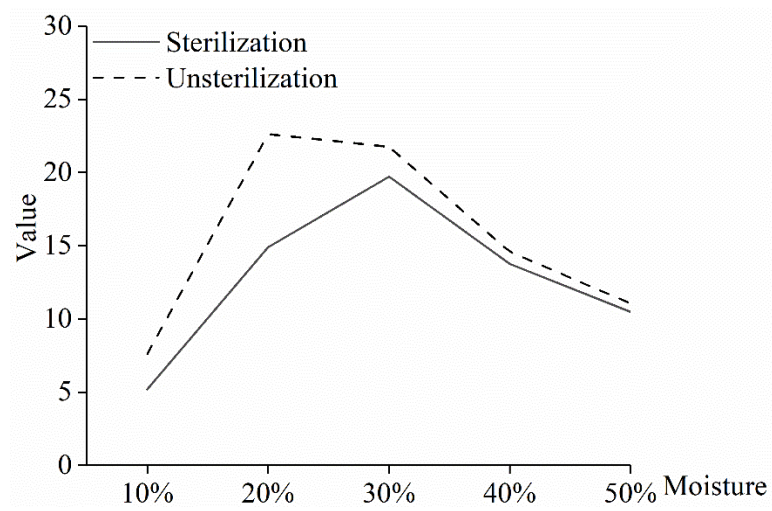

**Supplementary Figure 1 The interaction between soil treatment and water difference in the process of rhizosheath weight**
