# Supplementary material for: Specific Rhizobacteria Responsible in the Rhizosheath System of Kengyilia hirsuta
Source: Frontiers journal article supplement (doi:10.3389/fpls.2021.785971), 2022-01-28
Supplement: Image_2.pdf [file Image_2.pdf]

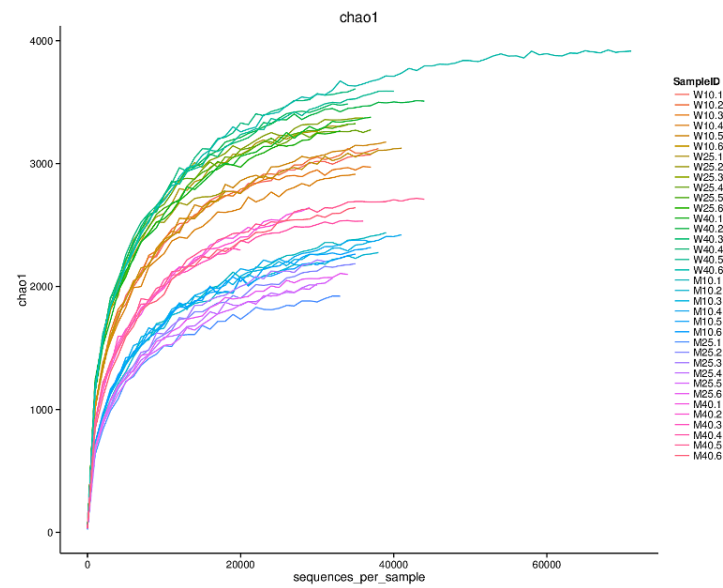

**Supplementary Figure 2 Rarefaction curve based on high-throughput sequencing.**
