# Supplementary material for: Specific Rhizobacteria Responsible in the Rhizosheath System of Kengyilia hirsuta
Source: Frontiers journal article supplement (doi:10.3389/fpls.2021.785971), 2022-01-28
Supplement: Image_3.pdf [file Image_3.pdf]

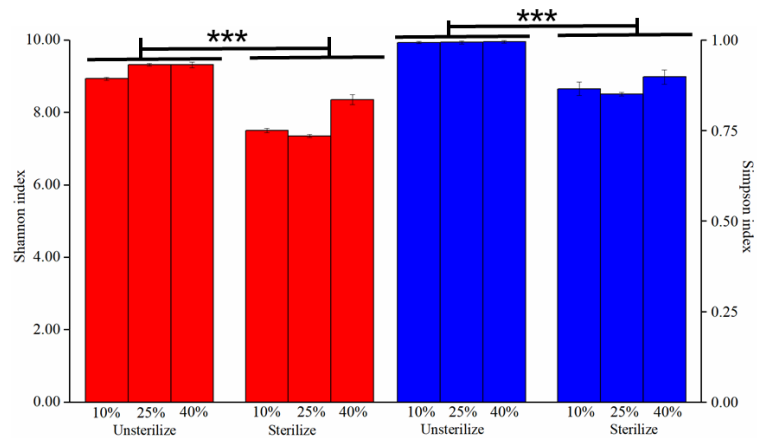

**Supplementary Figure 3 Shannon index in Alpha diversity of Rhizosheath soil bacteria**

\*\*\*indicate significant differences at  $P < 0.01$ .
